# Supplementary material for: Synthesis and Sensing Performance of Chitin Fiber/MoS2 Composites
Source: MDPI journal article supplement (doi:10.3390/nano13091567), 2023-05-06
Supplement: s1 [file s1]

# Synthesis and Sensing Performance of Chitin Fiber/MoS<sub>2</sub> Composites

Yuzhi Zhang <sup>1,2</sup>, Zhaofeng Wu <sup>1,2,\*</sup>, Jun Sun <sup>1,2,\*</sup>, Qihua Sun <sup>1,2</sup>, Fengjuan Chen <sup>1,2</sup>, Min Zhang <sup>1,2</sup> and Haiming Duan <sup>1,2</sup>

<sup>1</sup> School of Physics Science and Technology, Xinjiang University, Urumqi 830046, China

<sup>2</sup> Xinjiang Key Laboratory of Solid State Physics and Devices, Xinjiang University, Urumqi 830046, China

\* Correspondence: wuzf@xju.edu.cn (Z.W.); sunjun@xju.edu.cn (J.S.)

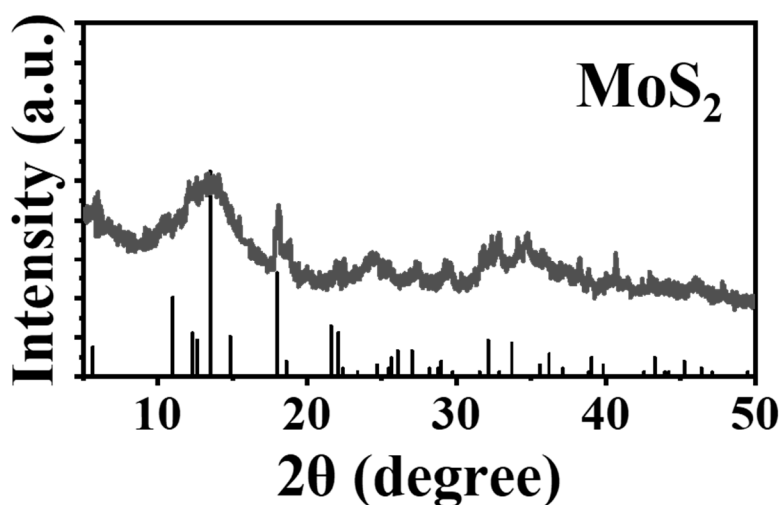

Figure S1. XRD patterns of MoS<sub>2</sub> with standard XRD JPCDS card of MoS<sub>2</sub>.

**Citation:** Zhang, Y.; Wu, Z.; Sun, J.; Sun, Q.; Chen, F.; Zhang, M.; Duan, H. Synthesis and Sensing Performance of Chitin Fiber/MoS<sub>2</sub> Composites. *Nanomaterials* **2023**, *13*, 1567. <https://doi.org/10.3390/nano13091567>

Academic Editor: Marco Cannas

Received: 4 April 2023

Revised: 26 April 2023

Accepted: 28 April 2023

Published: 6 May 2023

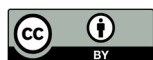

**Copyright:** © 2023 by the authors. Licensee MDPI, Basel, Switzerland. This article is an open access article distributed under the terms and conditions of the Creative Commons Attribution (CC BY) license (<https://creativecommons.org/licenses/by/4.0/>).

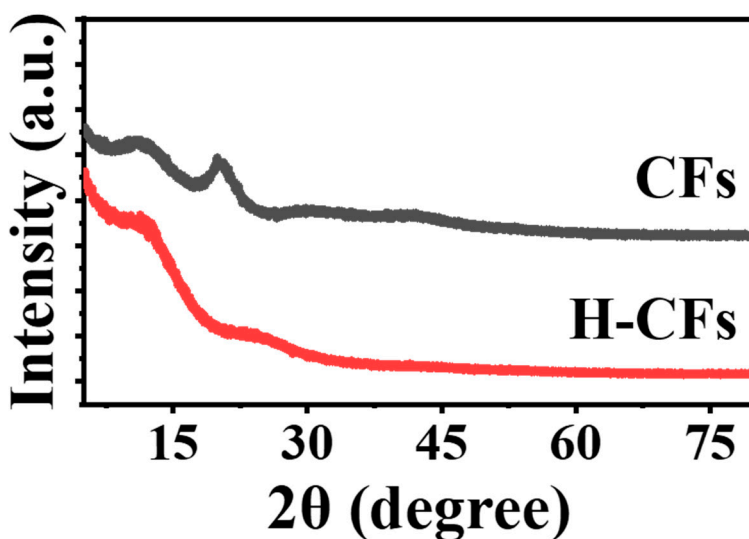

Figure S2. XRD patterns of CFs and H-CFs.

**Table S1.** Scanning analysis of C, N, O, S and Mo elements in EDS-Mapping.

| Type of element | Atomic % | Intensity (c/s) | Atomic Ratio |
|-----------------|----------|-----------------|--------------|
| C               | 37.550   | 1,102.90        | 1.0763       |
| N               | 5.129    | 317.25          | 0.1470       |
| O               | 34.888   | 2,273.73        | 1.0000       |
| S               | 11.021   | 7,253.09        | 0.3159       |
| Mo              | 11.412   | 6,841.62        | 0.3271       |
| Total           | 100      | --              | --           |
